# Supplementary material for: Engineering the passivation routes of perovskite films towards high performance solar cells
Source: Royal Society of Chemistry journal article supplement (doi:10.1039/d3sc06746g), 2024-01-01
Supplement: d3sc06746g1.pdf [file d3sc06746g1.pdf]

## Supporting Information

# **Engineering the passivation routes of the perovskite films towards high performance solar cells**

Liangzheng Zhu,<sup>ab</sup> Shendong Xu,<sup>bc</sup> Guozhen Liu,<sup>b</sup> Long Liu,<sup>ac</sup> Han Zhou,<sup>ac</sup> Zhiqiang Ai,<sup>ac</sup> Xu Pan<sup>\*b</sup> and Fapei Zhang<sup>\*ab</sup>

a. Anhui Province Key Laboratory of Condensed Matter Physics at Extreme Conditions, High Magnetic Field Laboratory, Hefei Institutes of Physical Science, Chinese Academy of Sciences, Hefei 230031, P. R. China.

b. Key Laboratory of Photovoltaic and Energy Conservation Materials, Institute of Solid State Physics, Hefei Institutes of Physical Science, Chinese Academy of Sciences, Hefei 230031, P. R. China.

c. University of Science and Technology of China, Hefei 230026, P. R. China.

\*Corresponding authors.

E-mail addresses: xpan@rntek.cas.cn (X. Pan), fzhang@hmfl.ac.cn (F. Zhang)

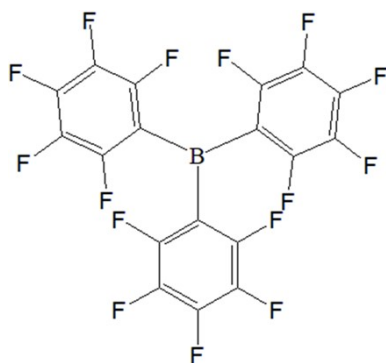

Fig. S1 Molecular structure of tris(pentafluorophenyl)borane (BCF).

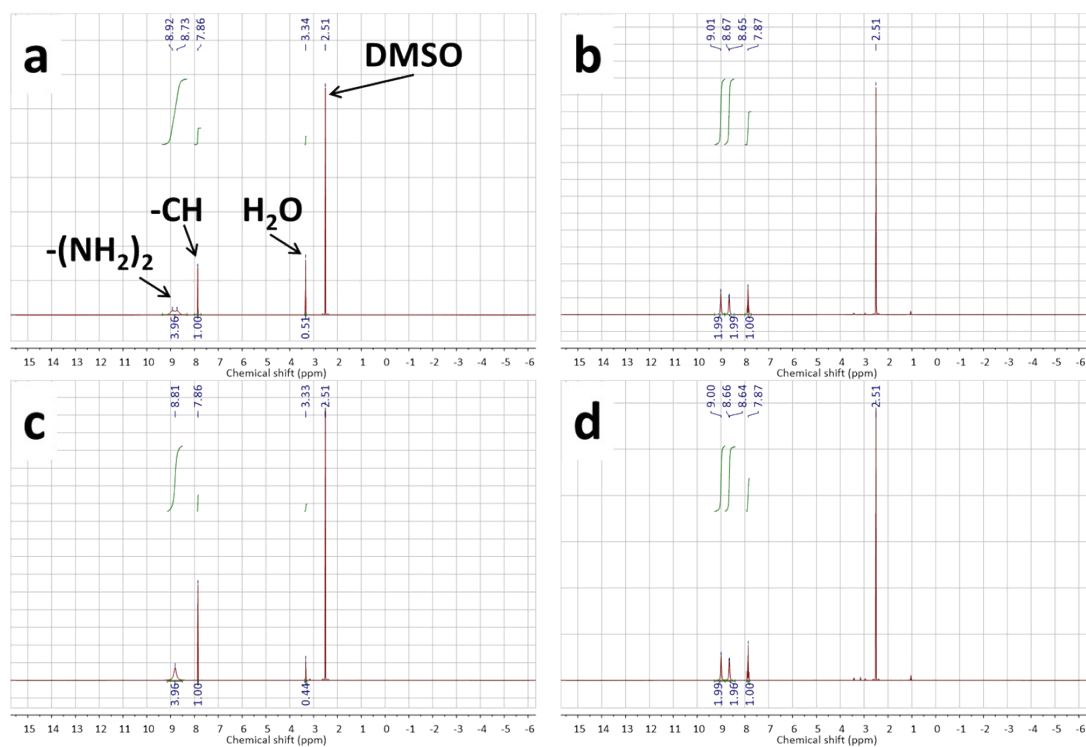

Fig. S2 Liquid-state  $^1\text{H}$  NMR full spectra (600 MHz, in pure  $\text{DMSO-d}_6$ ) of (a) FAI solution, (b) FAI solution with BCF, (c) perovskite solution and (d) perovskite solution with BCF.

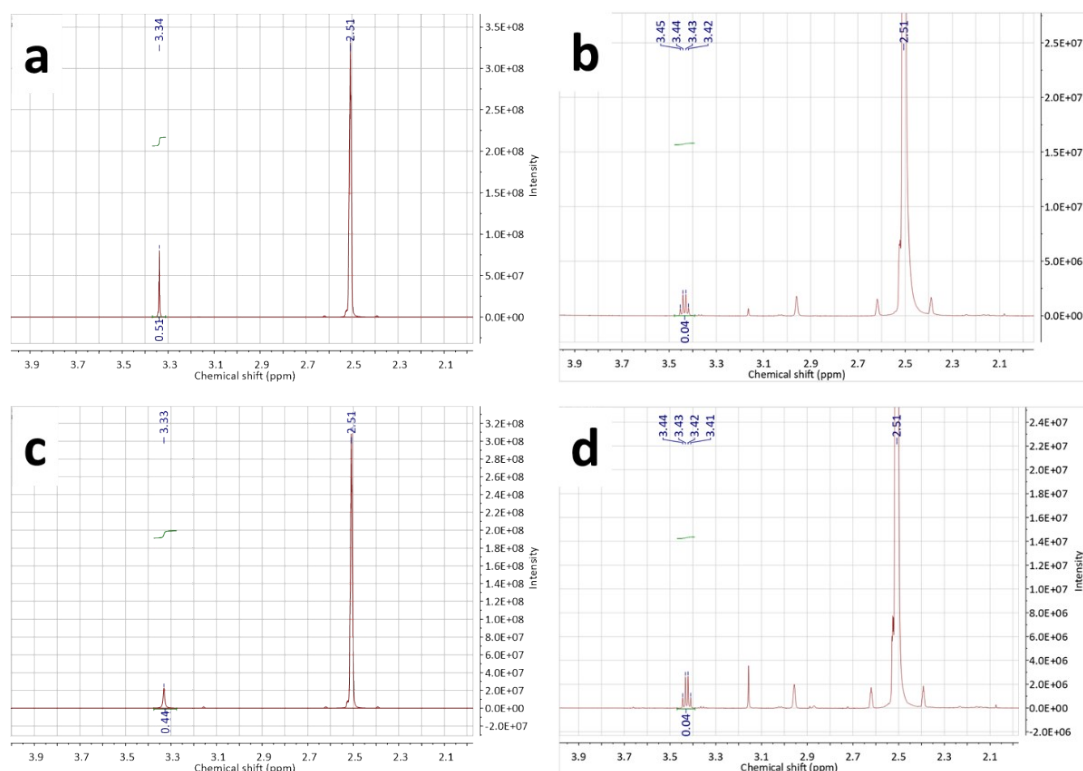

Fig. S3  $^1\text{H}$  NMR spectra range from 2 ppm to 4 ppm of (a) FAI solution, (b) FAI solution with BCF, (c) perovskite solution and (d) perovskite solution with BCF. (b) and (d) were magnified about ten times.

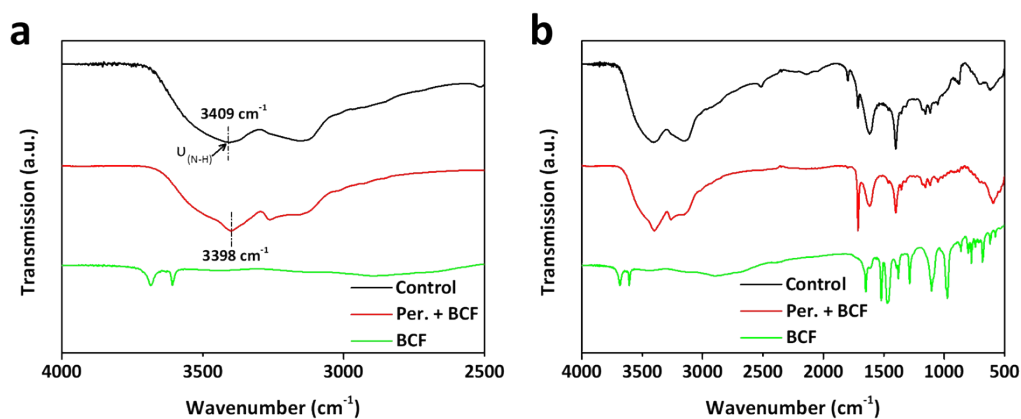

Fig. S4 FTIR spectra of control, BCF passivated perovskite films and pure BCF powders in the range of (a) 4000 - 2500  $\text{cm}^{-1}$  and (b) 4000 - 500  $\text{cm}^{-1}$ .

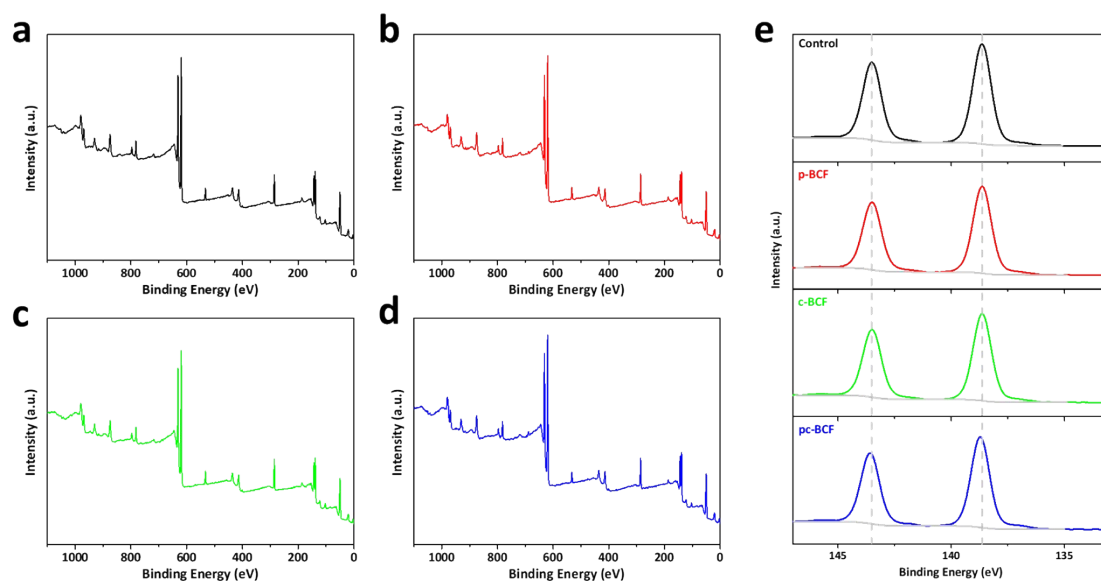

Fig. S5 XPS survey spectra for (a) control, (b) p-BCF, (c) c-BCF and (d) pc-BCF perovskite films. (e) XPS spectra of Pb 4f for the control, p-BCF, c-BCF and pc-BCF perovskite films.

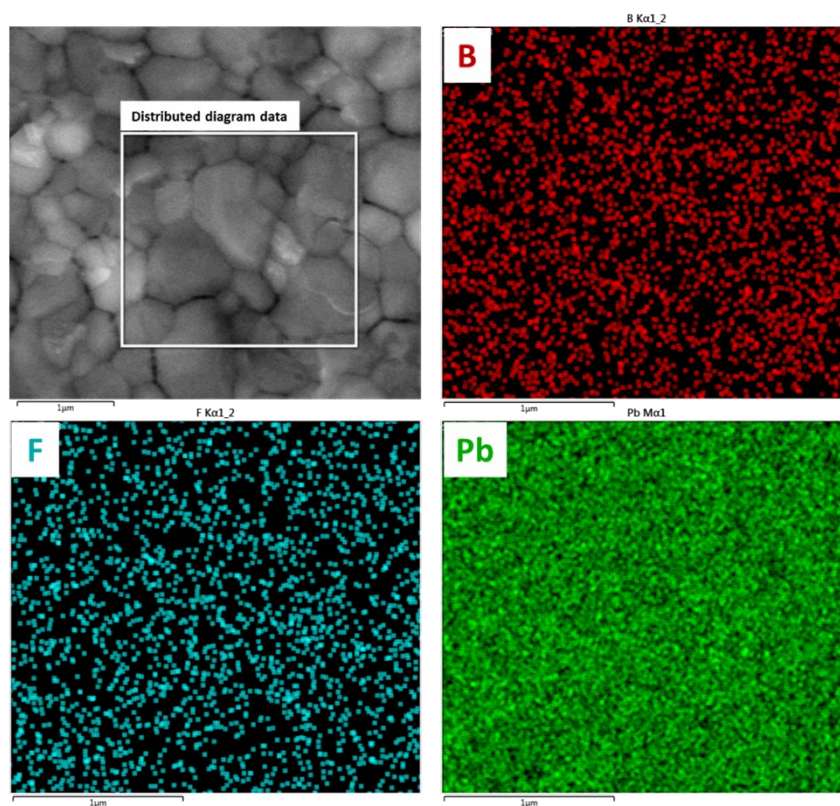

Fig. S6 SEM-EDS mapping of the B, F and Pb components in the p-BCF perovskite film.

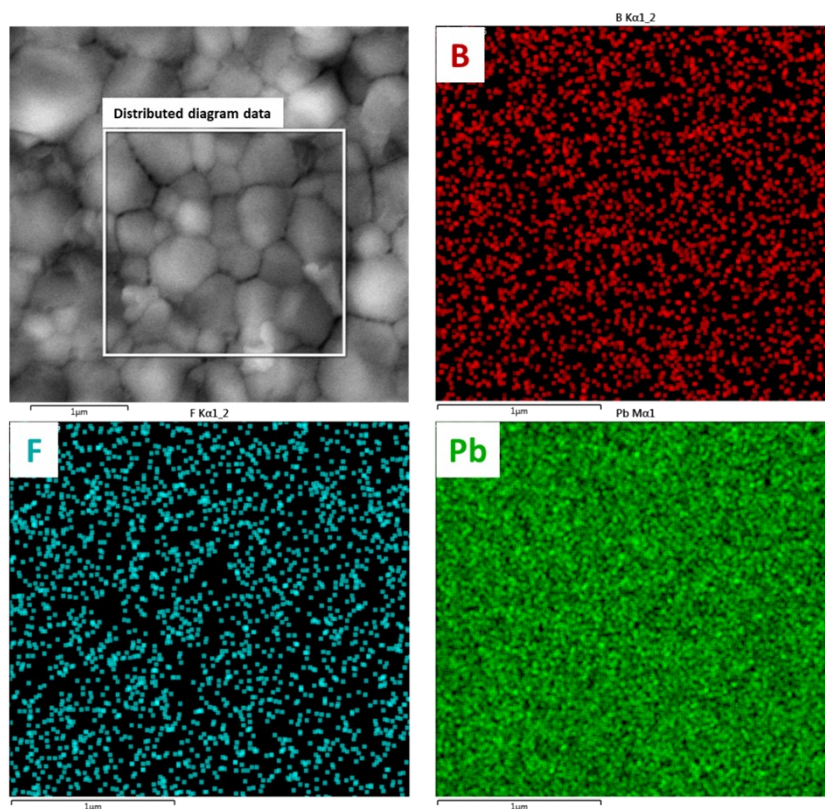

Fig. S7 SEM-EDS mapping of the B, F and Pb components in the c-BCF perovskite film.

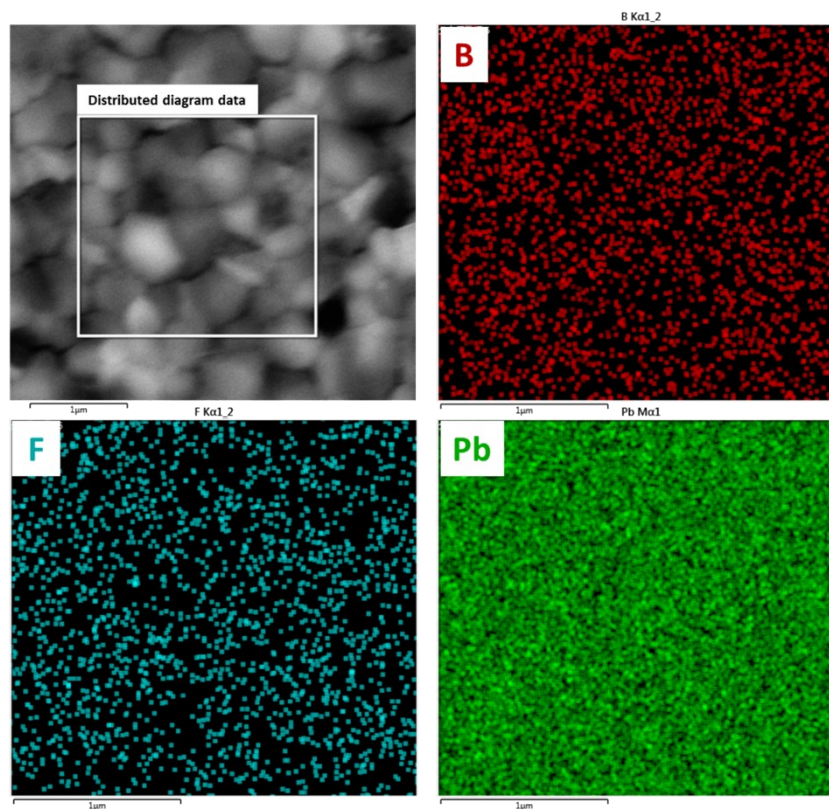

Fig. S8 SEM-EDS mapping of the B, F and Pb components in the pc-BCF perovskite



film.

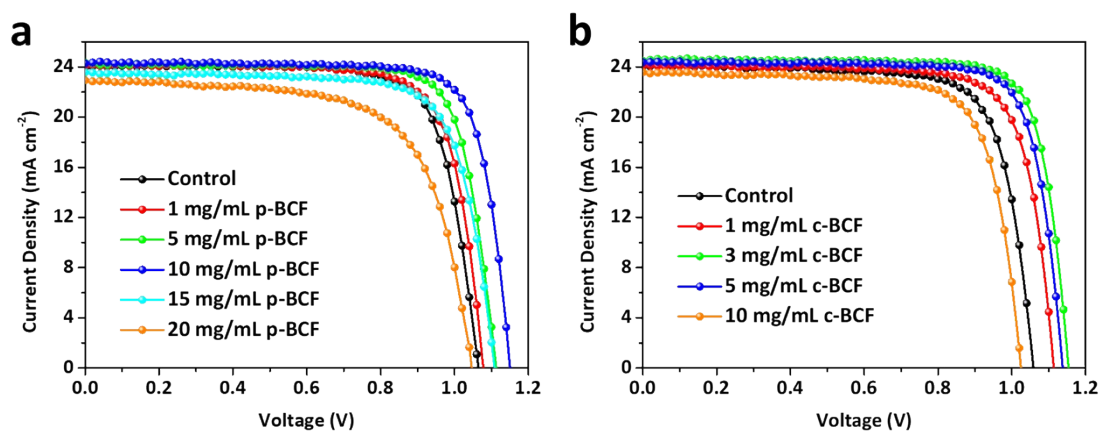

Fig. S9  $J$ - $V$  curves of perovskite solar cells with different concentration of BCF by (a) p-BCF treatment and (b) c-BCF treatment.

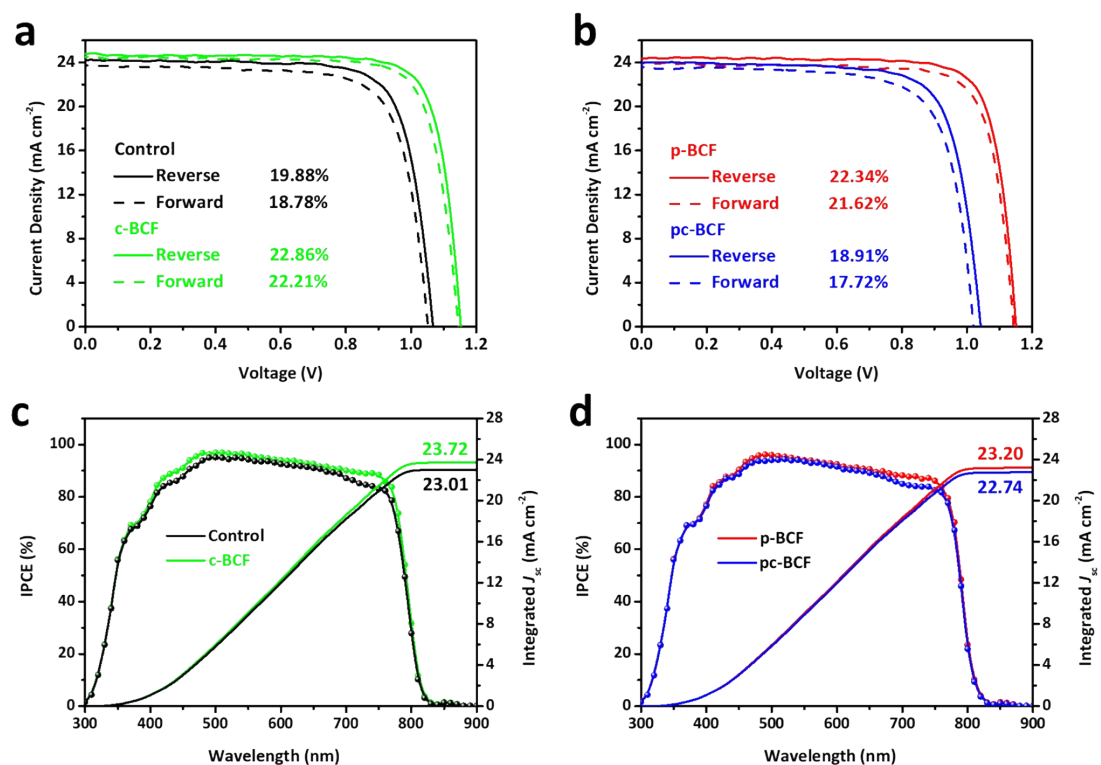

Fig. S10 (a), (b)  $J$ - $V$  curves under reverse and forward scan directions. (c), (d) Incident photon-to-electron conversion efficiency (IPCE) spectra and integrated  $J_{SC}$  of the corresponding devices.

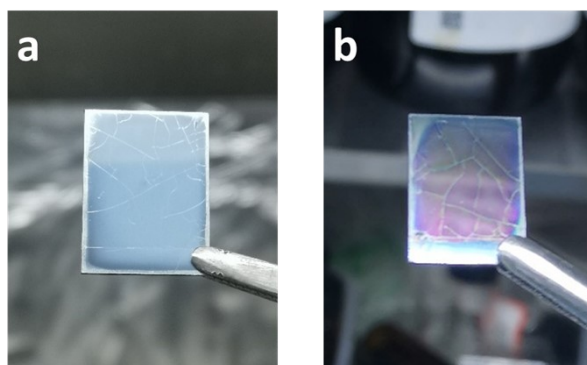

Fig. S11 The pc-BCF perovskite film (a) before and (b) after spiro-OMeTAD coating. After spin coating of HTM, the cracks on the films are still obvious.

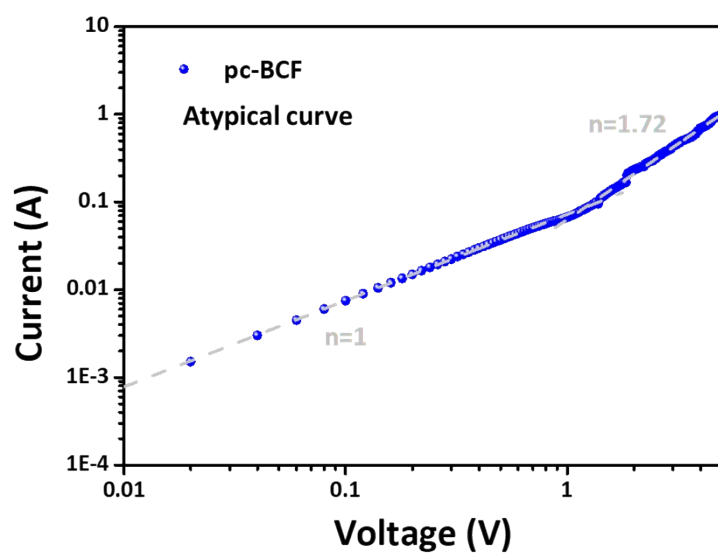

Fig. S12 Dark current–voltage ( $I-V$ ) curves of hole-only devices of pc-BCF perovskite.

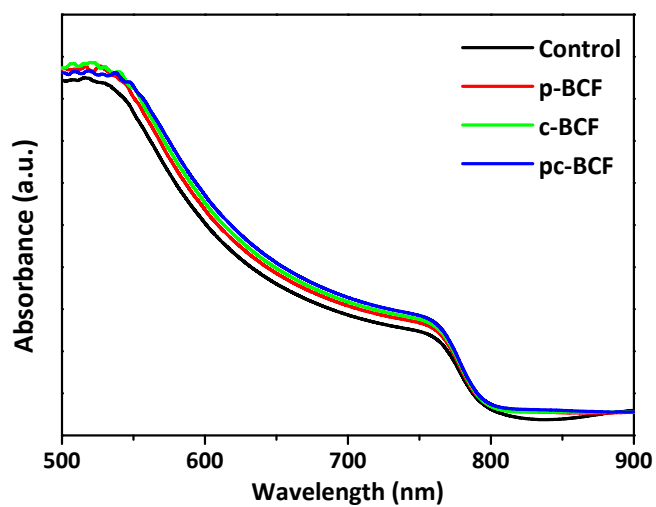

Fig. S13 UV-vis absorption spectra of the control, p-BCF, c-BCF and pc-BCF

perovskite films.

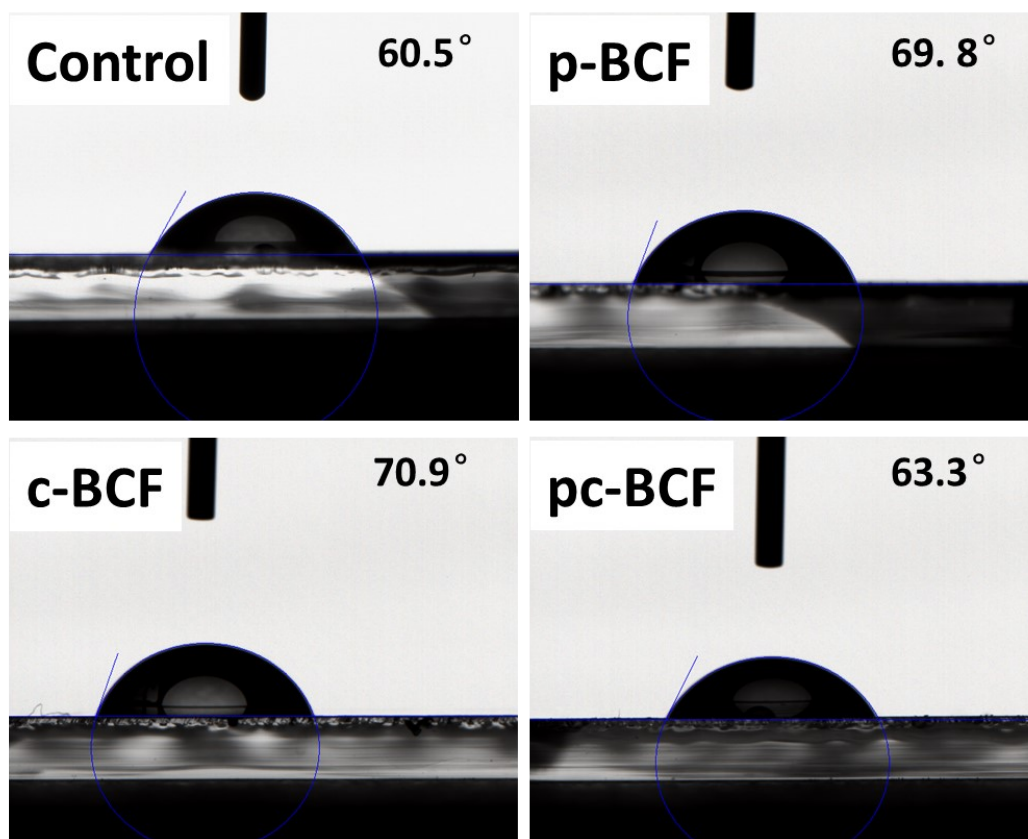

Fig. S14 Water contact angles of perovskite films based on different BCF treatments.

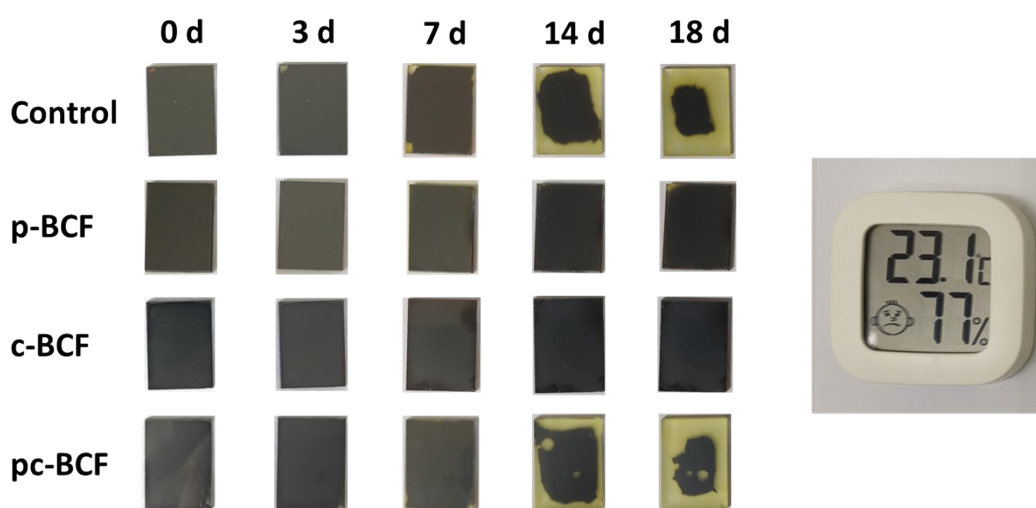

Fig. S15 The photographs of perovskite films based on different BCF treatments after aging under 75±5% RH for 18 days.



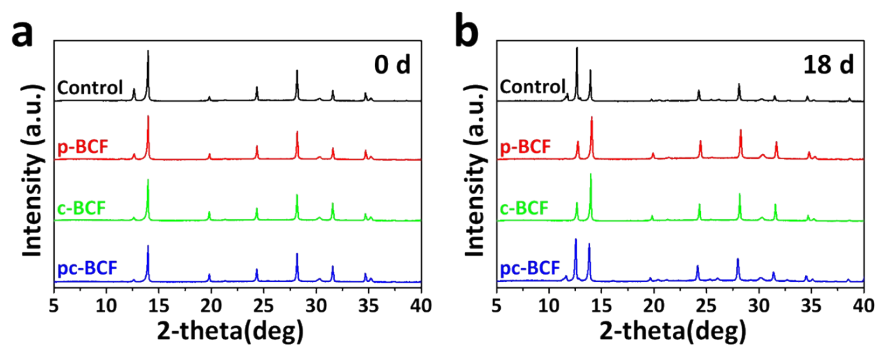

Fig. S16 XRD spectra of the perovskite films based on different treatments (a) before and (b) after aging under  $75\pm 5\%$  RH for 18 days.

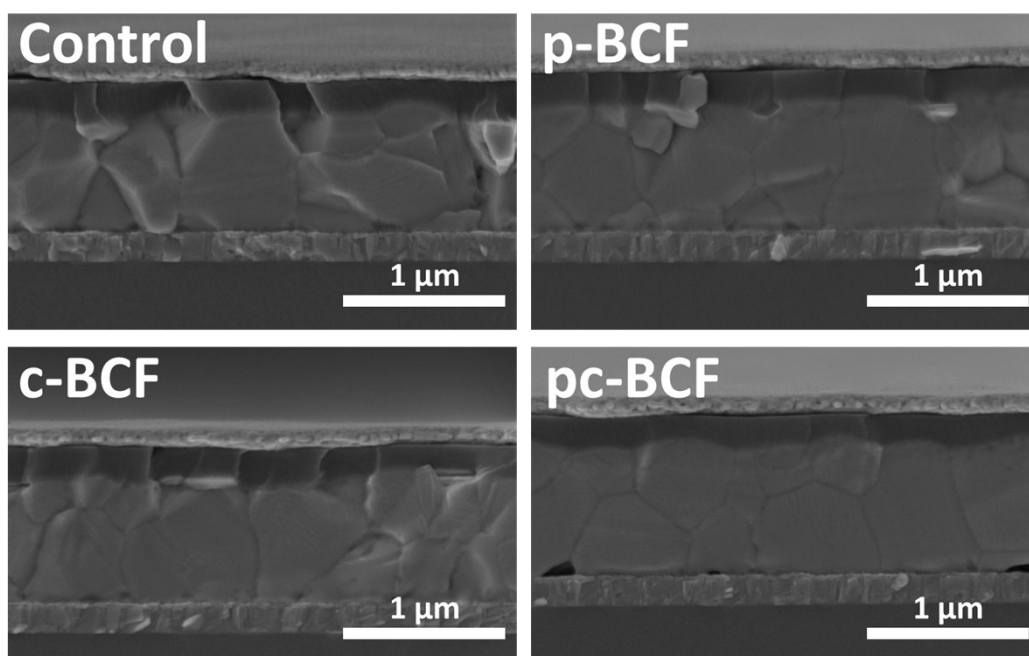

Fig. S17 Cross-sectional SEM images of the PSCs based on different BCF treatments.

Table S1 Detailed device parameters for perovskite solar cells with different concentration of BCF by p-BCF treatment.

| Concentration<br>of BCF<br>(mg/mL) | $J_{sc}$<br>( $\text{mA cm}^{-2}$ ) | $V_{oc}$<br>(V) | FF<br>(%) | PCE<br>(%) |
|------------------------------------|-------------------------------------|-----------------|-----------|------------|
| 0                                  | 24.04                               | 1.06            | 76.21     | 19.50      |
| 1                                  | 24.08                               | 1.08            | 76.44     | 19.82      |

|           |       |      |       |       |
|-----------|-------|------|-------|-------|
| <b>5</b>  | 24.29 | 1.11 | 78.29 | 21.15 |
| <b>10</b> | 24.32 | 1.15 | 79.41 | 22.19 |
| <b>15</b> | 23.54 | 1.11 | 75.14 | 19.59 |
| <b>20</b> | 22.93 | 1.04 | 67.05 | 16.05 |

Table S2 Detailed device parameters for perovskite solar cells with different concentration of BCF by c-BCF treatment.

| <b>Concentration<br/>of BCF<br/>(mg/mL)</b> | <b><math>J_{sc}</math><br/>(mA cm<sup>-2</sup>)</b> | <b><math>V_{oc}</math><br/>(V)</b> | <b>FF<br/>(%)</b> | <b>PCE<br/>(%)</b> |
|---------------------------------------------|-----------------------------------------------------|------------------------------------|-------------------|--------------------|
| <b>0</b>                                    | 24.07                                               | 1.08                               | 76.06             | 19.73              |
| <b>1</b>                                    | 24.13                                               | 1.11                               | 77.17             | 20.71              |
| <b>3</b>                                    | 24.53                                               | 1.15                               | 80.34             | 22.71              |
| <b>5</b>                                    | 24.42                                               | 1.14                               | 79.54             | 22.08              |
| <b>10</b>                                   | 23.51                                               | 1.02                               | 74.84             | 18.02              |

Table S3 Detailed device parameters for the best control, p-BCF, c-BCF and pc-BCF perovskite solar cells.

| <b>Treatment</b> | <b><math>J_{sc}</math><br/>(mA cm<sup>-2</sup>)</b> | <b><math>V_{oc}</math><br/>(V)</b> | <b>FF<br/>(%)</b> | <b>PCE<br/>(%)</b> |
|------------------|-----------------------------------------------------|------------------------------------|-------------------|--------------------|
| <b>Control</b>   | 24.21                                               | 1.07                               | 76.98             | 19.88              |
| <b>p-BCF</b>     | 24.36                                               | 1.15                               | 79.75             | 22.34              |
| <b>c-BCF</b>     | 24.78                                               | 1.15                               | 80.09             | 22.86              |
| <b>pc-BCF</b>    | 24.00                                               | 1.04                               | 75.61             | 18.91              |

Table S4 The fitted parameters of perovskite with and without BCF treatments deposited on glass substrates from TRPL spectra.

| <b>Treatment</b> | <b><math>\tau_1</math> (ns)</b> | <b><math>\tau_2</math> (ns)</b> | <b><math>A_1</math></b> | <b><math>A_2</math></b> | <b><math>\tau_{ave}</math> (ns)</b> |
|------------------|---------------------------------|---------------------------------|-------------------------|-------------------------|-------------------------------------|
| <b>Control</b>   | 41.56                           | 401.41                          | 1.10                    | 0.33                    | 309.08                              |

|               |       |        |      |      |        |
|---------------|-------|--------|------|------|--------|
| <b>p-BCF</b>  | 52.99 | 656.51 | 0.62 | 0.39 | 587.88 |
| <b>c-BCF</b>  | 52.68 | 761.78 | 0.59 | 0.39 | 694.62 |
| <b>pc-BCF</b> | 36.29 | 522.22 | 1.31 | 0.29 | 406.12 |

The TRPL curves are fitted via a bi-exponential formula:

$$Y = A_1 e^{\frac{-t}{\tau_1}} + A_2 e^{\frac{-t}{\tau_2}} + Y_0$$

where  $A_1$  and  $A_2$  are the decay amplitudes,  $\tau_1$  and  $\tau_2$  are the decay lifetimes,  $Y_0$  is a constant for the baseline offset. The fast ( $\tau_1$ ) and slow ( $\tau_2$ ) decay lifetimes are ascribed to the recombination occurring on the surface and in the bulk of perovskite films, respectively.<sup>1</sup> In order to comprehensively describe the recombination lifetime of charge carriers, the average lifetime is introduced according to the equation

$$\tau_{ave} = \frac{A_1 \tau_1^2 + A_2 \tau_2^2}{A_1 \tau_1 + A_2 \tau_2}$$

## References

- 1 J. Jeong, M. Kim, J. Seo, H. Lu, P. Ahlawat, A. Mishra, Y. Yang, M. A. Hope, F. T. Eickemeyer, M. Kim, Y. J. Yoon, I. W. Choi, B. P. Darwich, S. J. Choi, Y. Jo, J. H. Lee, B. Walker, S. M. Zakeeruddin, L. Emsley, U. Rothlisberger, A. Hagfeldt, D. S. Kim, M. Gratzel, J. Y. Kim, *Nature*, 2021, **592**, 381-385.
- 2 M. Du, X. Zhu, L. Wang, H. Wang, J. Feng, X. Jiang, Y. Cao, Y. Sun, L. Duan, Y. Jiao, K. Wang, X. Ren, Z. Yan, S. Pang, S. F. Liu, *Adv. Mater.*, 2020, **32**, e2004979.
